## BOOK REVIEW

*Acute Head Injury.* Publication No. 60, American Lecture Series. A Monograph in American Lectures in Surgery. By JOSEPH P. EVANS, M.D., Associate Professor of Surgery, University of Cincinnati College of Medicine. Pp. 116. Springfield, Illinois, Charles C Thomas, Publisher, 1950.

Dr. Evans discusses scalp injury, skull fracture, and meningeal hemorrhage in its various forms. In the section on scalp injuries he warns against treating this condition lightly and reviews certain important anatomic features. He classifies skull fractures and discusses treatment and his choice of anesthesia.

Meningeal hemorrhage is divided into epidural, subdural, and subarachnoid hemorrhage, and each subdivision

is discussed. Basic physiologic concepts of cerebral compression are considered and are divided into four stages on the basis of severity.

Dr. Evans then discusses cerebral trauma, describing cerebral concussion, cerebral swelling, cerebral contusion, laceration and intracerebral hematoma, and also focal cerebral cicatrix and late atrophic sclerosis of the white matter. Loss of consciousness is considered in association with the parts of the brain probably involved in normal conscious processes.

The information in this monograph will be of interest to anesthesiologists in their evaluation of patients suffering from acute head injury.

WALTER J. ALLEGREE, M.D., AND  
RALPH M. TOVELL, M.D.

---

### CHICAGO SOCIETY OF ANESTHESIOLOGISTS

Doctor F. A. Duncan Alexander, McKinney, Texas, will be the guest speaker at the monthly meeting of the Chicago Society of Anesthesiologists. It will be held on April 24, 1952, at the Michael Reese Hospital. His subject will be "The First Meeting in Thoracic Surgery: Its Anesthetic Implications Then and Now."
